**Title:** Synchronization and interaction of proline, ascorbate and oxidative stress pathways under abiotic stress combination in tomato plants

**Authors:** María Lopez-Delacalle<sup>1</sup>, Christian J Silva<sup>2</sup>, Teresa C Mestre<sup>1</sup>, Vicente Martinez<sup>1</sup>, Barbara Blanco-Ulate<sup>2\*</sup>, Rosa M Rivero<sup>1\*</sup>

(\* ) Corresponding authors

**Addresses of the institutions:**

<sup>1</sup> CEBAS-CSIC, Campus Universitario de Espinardo, 30100, Murcia, Spain.

<sup>2</sup> Department of Plant Sciences, University of California Davis, Davis, CA, 95616, USA.

**Author's emails:**

María Lopez-Delacalle: [mlopez@cebas.csic.es](mailto:mlopez@cebas.csic.es)

Christian J Silva: [cjsilva@ucdavis.edu](mailto:cjsilva@ucdavis.edu)

Teresa C Mestre: [tmestre@cebas.csic.es](mailto:tmestre@cebas.csic.es)

Vicente Martinez: [vicente@cebas.csic.es](mailto:vicente@cebas.csic.es)

Barbara Blanco-Ulate: [bblanco@ucdavis.edu](mailto:bblanco@ucdavis.edu)

Rosa M Rivero: [rmrivero@cebas.csic.es](mailto:rmrivero@cebas.csic.es)

**Date of Submission:** June 30th 2020

**N° Figures:** 6

**Word Count:**

**Supplemental material:** 7 supplemental tables  
3 supplemental figures.

**HIGHLIGHTS:**

- The combination of salinity and heat causes a unique reprogramming of tomato metabolic pathways by changing the expression of specific genes and metabolic features.
- Proline and ascorbate pathways act synchronously to maintain cellular redox homeostasis
- Key transcription factors from the basic Leucine Zipper Domain (bZIP), Zinc Finger Cysteine-2/Histidine-2 (C2H2) and Trihelix families were identified as putative regulators of the identified up-regulated genes under salinity and heat combination.

## **ABSTRACT**

Adverse environmental conditions have a devastating impact on plant productivity. In nature, multiple abiotic stresses occur simultaneously, and plants have evolved unique responses to cope against this combination of stresses. Here, we coupled genome-wide transcriptional profiling and untargeted metabolomics with physiological and biochemical analyses to characterize the effect of salinity and heat applied in combination on the metabolism of tomato plants. Our results demonstrate that this combination of stresses causes a unique reprogramming of metabolic pathways, including changes in the expression of 1,388 genes and the accumulation of 568 molecular features. Pathway enrichment analysis of transcript and metabolite data indicated that the proline and ascorbate pathways act synchronously to maintain cellular redox homeostasis, which was supported by measurements of enzymatic activity and oxidative stress markers. We also identified key transcription factors from the basic Leucine Zipper Domain (bZIP), Zinc Finger Cysteine-2/Histidine-2 (C2H2) and Trihelix families that are likely regulators of the identified up-regulated genes under salinity+heat combination. Our results expand the current understanding of how plants acclimate to environmental stresses in combination and unveils the synergy between key cellular metabolic pathways for effective ROS detoxification. Our study opens the door to elucidating the different signaling mechanisms for stress tolerance.

**Keywords:** salinity, heat, protein oxidation, lipid peroxidation, reactive oxygen species, plant stress.



## 1 INTRODUCTION

2 Multiple environmental factors such as salinity, high temperatures, cold, or drought  
3 cause abiotic stresses in plants, which result in large agricultural losses worldwide,  
4 estimated to be around \$14–19 million (Rivera *et al.*, 2017). Under field conditions,  
5 different abiotic stressors usually occur at the same time; for example, it is common that  
6 high temperatures coexist with highly saline soils or water scarcity. Studies in the last  
7 decade have shown that plant responses to combined abiotic stresses are unique and  
8 cannot be deduced from the study of plants subjected to each stress separately (Mittler,  
9 2006; Miller *et al.*, 2010; Rivero *et al.*, 2014; Anjum *et al.*, 2019; Sehgal *et al.*, 2019;  
10 Lopez-Delacalle *et al.*, 2020; Zandalinas *et al.*, 2020).

11 Many metabolic mechanisms act in concert during the plant's response to abiotic stress,  
12 including rapid changes in gene expression, ionic adjustment, and activation and  
13 inactivation of proteins that carry out the synthesis and degradation of compounds used  
14 for cell signaling and protection (e.g., osmoprotectants and antioxidants), among others  
15 (Rivero *et al.*, 2014; Zushi *et al.*, 2014; Zandalinas *et al.*, 2020). Proline has been widely  
16 reported to act as an osmoprotectant in plant defense against certain stress conditions,  
17 such as drought and salinity (Rivero *et al.*, 2004b, 2014)(Rivero *et al.*, 2004b, 2014;  
18 Martinez *et al.*, 2018). Under heat stress, plants synthesize proline, as reported by the  
19 induction of pyrroline-5-carboxylate synthase (P5CS) and the subsequent accumulation  
20 of the amino acid (Rivero *et al.*, 2004b; Torres *et al.*, 2006). Shalata & Neumann (2001)  
21 have also reported that under salinity, proline accumulation can improve plant salt  
22 tolerance and reduce oxidative damage by decreasing lipid peroxidation in tomato  
23 plants.

24 Stress conditions cause the accumulation of reactive oxygen species (ROS), which are  
25 known to induce oxidative stress (e.g., lipid peroxidation) and serve as signaling  
26 molecules in plants (Suzuki *et al.*, 2012; Kollist *et al.*, 2019). Plants accumulate  
27 antioxidants, such as ascorbate (ASC), glutathione (GSH), carotenoids, tocopherols, and  
28 flavonoids, and activate enzymatic reactions to maintain cell homeostasis under  
29 increasing oxidative conditions. The ASC/GSH cycle is critical for detoxifying ROS  
30 from plant cells. Briefly, the hydrogen peroxide (H<sub>2</sub>O<sub>2</sub>) generated by detoxification of  
31 superoxide radicals is further converted to H<sub>2</sub>O and O<sub>2</sub> by ASC peroxidase (APX), the  
32 first enzyme of the ASC/GSH cycle, using ASC as an electron donor (Noctor and Foyer,  
33 1998). Because ASC is considered the first antioxidant line of defense in H<sub>2</sub>O<sub>2</sub>

34 detoxification (Foyer and Noctor, 2011; Akram *et al.*, 2017), it is expected that plants  
35 with a high cellular accumulation of this compound will have a greater tolerance to  
36 oxidative stress. In fact, tomato seeds treated with ascorbic acid have been shown to  
37 have better tolerance to salinity stress, improved germination, and better growth  
38 parameters (Sayed, 2013). We have previously reported (Rivero *et al.* 2004) that  
39 enzymes that belong to the ASC/GSH cycle were inhibited in tomato plants under high  
40 temperature, leading to H<sub>2</sub>O<sub>2</sub> accumulation and inhibition of plant growth and yield. In  
41 addition to its importance in ROS detoxification, the cellular content of GSH and ASC  
42 improves osmoregulation, efficient use of water, photosynthetic activity, and general  
43 parameters of plant productivity (Noctor and Foyer, 1998; Meyer, 2008; Foyer and  
44 Noctor, 2011).

45 Plants need to rapidly regulate and fine-tune their responses to stress in order to  
46 maximize energy expenditure in adverse conditions. Transcription factors (TFs) are  
47 considered key components in the control of abiotic stress signaling (Schmidt *et al.*,  
48 2012; Castelán-Muñoz *et al.*, 2019); however, little is known about their role in stress  
49 combination. Just recently, a report by Zandalinas *et al.* (Zandalinas *et al.*, 2020) found  
50 that *Arabidopsis* plants induced a unique set of TFs when subjected to different abiotic  
51 stress combinations, and that those genes were relatively unique across stress  
52 conditions.

53 Here we hypothesize that the combination of salinity and heat induces a unique  
54 physiological response in tomato plants by activating specific regulatory and metabolic  
55 pathways that act synergistically to maintain cell redox homeostasis. In this work, we  
56 analyze how the combination of salinity and heat affects the transcriptome and  
57 metabolome of tomato plants in order to find the unique elements that are differentially  
58 regulated under these stress conditions and that may be key in ROS detoxification and,  
59 thus, plant tolerance to abiotic stress combination.

## 60 MATERIALS AND METHODS

### 61 Plant material, experimental design, and growth conditions

62 *Solanum lycopersicum* L cv. Boludo (Monsanto) seeds were germinated in vermiculite  
63 under optimal and controlled conditions in a growth chamber (chamber A). These  
64 conditions were: a photoperiod of 16/8 hours of day/night with a light intensity of 500  
65  $\mu\text{mol m}^{-2} \text{s}^{-1}$ , a relative humidity (RH) between 60 and 65% and a temperature of 25 °C.  
66 Subsequently, when the plants had at least two true leaves, they were transplanted to an  
67 aerated hydroponic system containing a modified Hoagland solution and grown under  
68 these conditions for one week. The nutrient solution had the following composition:  
69  $\text{KNO}_3$  (3 mM),  $\text{Ca}(\text{NO}_3)_2$  (2 mM),  $\text{MgSO}_4$  (0.5 mM),  $\text{KH}_2\text{PO}_4$  (0.5 mM), Fe-EDTA (10  
70  $\mu\text{M}$ ),  $\text{H}_3\text{BO}_3$  (10  $\mu\text{M}$ ),  $\text{MnSO}_4 \cdot \text{H}_2\text{O}$  (1  $\mu\text{M}$ ),  $\text{ZnSO}_4 \cdot 7\text{H}_2\text{O}$  (2  $\mu\text{M}$ ),  $\text{CuSO}_4 \cdot 5\text{H}_2\text{O}$  (0.5  
71  $\mu\text{M}$ ), and  $(\text{NH}_4)_6\text{Mo}_7\text{O}_{24} \cdot 4\text{H}_2\text{O}$  (0.5  $\mu\text{M}$ ) (Hoagland and Arnon, 1950). The electric  
72 conductivity (EC) and pH of the nutrient solution were measured and maintained within  
73 1.4–1.7  $\text{mS} \cdot \text{cm}^{-1}$  and 5.2–5.6, respectively. After acclimatization, half of the plants were  
74 transferred to a twin chamber whose temperature was previously set at 35 °C (chamber  
75 B). In both twin chambers, a saline concentration in the nutrient solution of 75 mM  
76 NaCl was added to half of the plants. Therefore, four different conditions were  
77 obtained: control (25 °C 0 mM NaCl), salinity (25 °C and 75 mM NaCl), heat (35 °C 0  
78 mM NaCl), and salinity and heat (35 °C and 75 mM NaCl). Plants were kept under  
79 these conditions for a period of 14 days. After this time, six plants from each treatment  
80 were sampled for subsequent analysis.

81

### 82 Measurements of photosynthetic parameters

83 Photosynthetic parameters were determined on a fully-expanded, metabolically-mature  
84 middle leaf in all plants. These data were taken with a gas exchange system (LI-COR  
85 6400, Li-Cor) at the beginning (day 0), the middle (day 7), and at the end of the  
86 experiment (day 14). The conditions established in the LI-COR were: 1000  $\mu\text{mol}$   
87  $\text{photons m}^{-2} \text{s}^{-1}$  and 400  $\mu\text{mol mol}^{-1} \text{CO}_2$ . The leaf temperature was maintained at 25 °C  
88 for control and salinity treatment plants, and at 35 °C for plants in the high temperature,  
89 and the combination of high temperature and salinity treatments. The leaf-air vapor  
90 pressure deficit was maintained between 1-1.3 kPa. With this analysis, the device  
91 reported data on  $\text{CO}_2$  assimilation, stomatal conductance, and transpiration rate. At the

92 end of the experiment, the leaves, stem, and root were separated, and the fresh weight  
93 (FW) of each part of the plant was determined separately.

94

## 95 **Quantification of oxidative stress-related markers**

### 96 *H<sub>2</sub>O<sub>2</sub> accumulation*

97 H<sub>2</sub>O<sub>2</sub> was extracted as described by Yang et al. (2007), with some modifications, which  
98 are fully described in García-Martí et al. (García-Martí *et al.*, 2019). The samples were  
99 used for the future determination of H<sub>2</sub>O<sub>2</sub> concentration and lipid peroxidation. H<sub>2</sub>O<sub>2</sub>  
100 was quantified as described by MacNevin and Urone (1953).

### 101 *Lipid peroxidation*

102 For lipid peroxidation determination, malondialdehyde (MDA) was used, which is a  
103 product of the peroxidation of membrane lipids. The same enzyme extract as the one  
104 utilized for the determination of H<sub>2</sub>O<sub>2</sub> was used. The procedure was described by Fu  
105 and Huang (2001).

### 106 *Antioxidant capacity*

107 Regarding antioxidant capacity, it was carried out according to the protocol by Koleva  
108 *et al.* (2002). The remaining amount of 2,2-diphenyl-1-picrylhydrazyl (DPPH),  
109 measured at a certain time, is inversely proportional to the antioxidant capacity of the  
110 substances present in the sample. Results are expressed as % Radical Scavenging  
111 Activity (RSA), or percentage of free radical scavenging activity.

### 112 *Protein oxidation*

113 Protein oxidation was assayed as according to Reznick and Packer (1994). PCO groups  
114 react with 2,4-dinitrophenylhydrazine (DNPH) to generate chromophoric  
115 dinitrophenylhydrazones, which can be recorded with a spectrophotometer. The  
116 absorbance was measured at 360 nm, using the molar extinction coefficient of DNPH  
117  $2.2 \times 10^4 \text{ M}^{-1} \text{ cm}^{-1}$ .

## 118 **RNA extraction and sequencing**

119 Total RNA was extracted from 1 g of frozen tomato leaves using TRI-Reagent (Sigma-  
120 Aldrich) and following the manufacturer's instruction. The quantity and quality of RNA  
121 were determined using a NanoDrop 3300 fluorospectrometer (Thermo Scientific  
122 Instruments, USA). Three biological replications for each treatment were used for total  
123 RNA extraction and sequencing. For each RNA sample, mRNA was enriched using a  
124 Dynabeads mRNA purification kit (Invitrogen), then the samples were sent to BGI-

125 Shenzhen (hereafter ‘BGI’, China) for RNA sequencing. Sequencing was carried out on  
126 a HiSeq2000 according to the Illumina protocols for 90××2 pair-end sequencing  
127 covering a read length of 100 bp. An average of 10 Gb clean data per sample was  
128 generated after filtering to ensure a complete set of expressed transcripts with sufficient  
129 coverage and depth for each sample.

130

### 131 **Bioinformatics pipeline**

#### 132 *RNA sequencing and data processing*

133 Raw sequencing reads were trimmed for quality and adapter sequences using  
134 Trimmomatic v0.33 (Bolger *et al.*, 2014) were used with the following parameters:  
135 maximum seed mismatches = 2, palindrome clip threshold = 30, simple clip threshold =  
136 10, minimum leading quality = 3, minimum trailing quality = 3, window size = 4,  
137 required quality = 15, and minimum length = 36. Trimmed reads were mapped using  
138 Bowtie2 (Langmead and Salzberg, 2012) to the tomato transcriptome (SL4.0 release;  
139 <http://solgenomics.net>). Count matrices were made from the Bowtie2 results using  
140 sam2counts.py v0.91 (<https://github.com/vsbuffalo/sam2counts/>). A summary of the  
141 quality assessment and mapping results can be found in **Supplemental Table S1**. The  
142 raw sequencing reads and the read mapping count matrices are available in the National  
143 Center for Biotechnology Information Gene Expression Omnibus database under the  
144 accession GSE152620.

#### 145 *Differential expression analysis*

146 The Bioconductor package DESeq2 (Love *et al.*, 2014) was used to perform  
147 normalization of read counts and differential expression analyses for various treatment  
148 comparisons. Differentially expressed (DE) genes for each comparison were those with  
149 an adjusted p-value of less than or equal to 0.05.

#### 150 *Functional annotation and enrichment analyses*

151 Basic functional annotations for genes were determined with the Automated  
152 Assignment of Human Readable Descriptions (AHRD) provided in the SL4.0 build of  
153 the tomato genome. KEGG annotations were determined using the KEGG Automatic  
154 Annotation Server (Moriya *et al.*, 2007). Enrichments were conducted via Fisher’s exact  
155 test with p-values adjusted using the Benjamini and Hochberg method (Benjamini and  
156 Hochberg, 1995).

#### 157 *Promoter motif analysis*

158 Binding motifs for tomato transcription factors were obtained from the Plant  
159 Transcription Factor Database (<http://planttfdb.cbi.pku.edu.cn/>). Promoter sequences  
160 defined as 1000 base pairs upstream from the transcription start site of each gene were  
161 obtained using the ‘flank’ function in bedtools v2.29.2  
162 (<https://bedtools.readthedocs.io/en/latest/>). Enrichment of transcription factor binding  
163 motifs on the promoter sequences of up-regulated genes was performed using the  
164 Analysis of Motif Enrichment tool in MEME-Suite (McLeay and Bailey, 2010) using  
165 all non-up-regulated tomato genes as the control sequences, the average odds score  
166 scoring method and Fisher's exact test.

167

### 168 **Metabolomics analysis**

169 Six biological replications of frozen tomato leaves per treatment were used for the  
170 metabolomics analysis. One gram of this frozen plant material was extracted in  
171 methanol: water (3:1 v/v) as described previously in Martinez *et al.* (2016). Agilent  
172 MassHunter Qualitative analysis software v 6.00 (Agilent Technologies, Palo Alto,  
173 USA) was used to obtain an initial peak processing (**Supplemental Fig. S1**). Then,  
174 XCMS online software ([www.xcmsonline.scripts.edu](http://www.xcmsonline.scripts.edu)) which incorporates CAMERA (a  
175 Bioconductor package to extract spectra, annotate isotopes and adduct peaks, among  
176 other functions) in its analysis, was implemented in our curated raw data  
177 (**Supplemental Table S2**). A second level of statistical analysis was carried out,  
178 consisting of data normalization of the peaks obtained for each treatment against the  
179 control, and a t-test followed by an ANOVA analysis. Then,  $\log_2$  of the fold-change was  
180 calculated and all the molecular features with a  $P_{adj}$  adjusted greater than 0.05 and a  $\log_2$   
181 fold change (FC) greater than -1 or smaller than 1 were eliminated from the analyses  
182 (**Supplemental Table S3**). All the molecular features that remained after these  
183 restricted statistical analyses were compared among the different treatments applied  
184 (supplemental Table S3; Euler diagram Fig 3B).

185 The metabolite identification of the molecular features of interest for this study was  
186 performed using a mathematical search based on the predicted elemental composition  
187 through some of the most important open-source databases (MOTO, KNApSACk,  
188 KOMOCS, MassBank, ARMeC and METLIN) within a mass tolerance of 10 ppm.  
189 Then, the isotope ratio (IR) and retention time (rt) from the different metabolites  
190 identified unequivocally were checked again across the different databases mentioned

191 above. Identified metabolites that remained after this filtering were labeled accordingly  
192 and highlighted in yellow in **Supplemental Table S4**. The concentration of the  
193 compounds that showed significant differences ( $P_{adj} < 0.05$  and  $\log_2 FC > 2$ ) under  
194 salinity and heat combination as compared to control plants and which were of interest  
195 in this study were plotted in a box-and-whisker type plot using XCMS online  
196 (**Supplemental Figs. S2 and S3**).

197

## 198 **Enzymatic activities**

### 199 *Crude extract*

200 All enzymatic activities were extracted according to the procedure described by Torres  
201 *et al.* (2006).

### 202 *Superoxide dismutase (SOD)*

203 SOD activity was assayed as described previously by McCord JM (1969). SOD activity  
204 was expressed as units of SOD ( $\text{mg prot}^{-1} \text{min}^{-1}$ ), a unit which indicates the amount of  
205 enzyme needed to neutralize one unit of xanthine oxidase.

### 206 *Catalase (CAT)*

207 CAT activity was calculated using the extinction coefficient of  $39.4 \text{ mM}^{-1} \text{ cm}^{-1}$  as  
208 described by Aebi (1984). CAT activity was expressed as  $\mu\text{mol}$  of reduced  $\text{H}_2\text{O}_2$  ( $\text{mg}$   
209  $\text{prot}^{-1} \text{min}^{-1}$ ).

### 210 *Ascorbate peroxidase (APX) Dehydroascorbate reductase (DHAR) and* 211 *Monodehydroascorbate reductase (MDHAR)*

212 APX, DHAR and MDHAR activities were assayed as described by Miyake and Asada  
213 (1992). The rate of reaction was calculated using a molar extinction coefficient of  $2.8$   
214  $\text{mM}^{-1} \text{ cm}^{-1}$ . APX activity was expressed as  $\mu\text{mol}$  of reduced ascorbic acid ( $\text{mg prot}^{-1}$   
215  $\text{min}^{-1}$ ).

### 216 *Glutathione peroxidase (GPX)*

217 GPX activity was carried out using the Glutathione Peroxidase Assay Kit (Abcam, Ref.  
218 ab102530, Cambridge, UK) considering the decrease of NADPH at 340 nm, using an  
219 extinction coefficient of  $6.22 \text{ mM}^{-1} \text{ cm}^{-1}$ .

### 220 *Glutathione reductase (GR)*

221 GR activity was assayed through the non-enzymatic NADPH oxidation (Halliwell and  
222 Foyer, 1976). The activity was determined by measuring the decrease in the reaction  
223 rate at 340nm and was calculated from the  $6.22 \text{ mM}^{-1}$  extinction coefficient.



224 *Protein concentration in the enzyme extract*

225 Proteins were quantified with the Bradford method (Bradford, 1976), in which a volume  
226 of Bradford Reagent reagent (BioRAD, Catalog No. 30214) was added to an aliquot of  
227 the enzyme extract. The absolute values as well as the calculated  $\log_2$  of the data  
228 normalized against control plants of all the enzymatic activities assayed can be found in  
229 **Supplementary Table S5**.

230

### 231 **Statistical analysis**

232 Statistical analysis for FW, photosynthetic parameters,  $H_2O_2$  concentration, MDA  
233 content, protein oxidation, and enzymatic activities were performed with an analysis of  
234 variance with p-value  $< 0.05$  set as the cut-off value, as indicative of significant  
235 differences, followed by a Duncan test and a t-test when necessary. Transcriptomics and  
236 metabolomics statistical analysis was performed as described above.

237

## 238 **RESULTS**

### 239 **Tomato plants grown under the combination of salinity showed a better** 240 **performance in the photosynthetic parameters as compared to salinity alone**

241 Eighty-four tomato plants were grown in two independent chambers using four different  
242 environmental conditions: 25 °C and 0 mM NaCl (control), 25 °C and 75 mM NaCl  
243 (salinity), 35 °C and 0 mM NaCl (heat), and 35 °C and 75 mM NaCl (salinity + heat)  
244 for 14 days (**Fig. 1A**). Fresh weight was recorded at the end of the experiment (**Fig. 1B**).  
245 Salinity and the salinity + heat resulted in a significant reduction of biomass when  
246 compared to control plants, whereas the heat-treated plants did not differ significantly  
247 from the controls. Interestingly, when salinity and heat were applied simultaneously, the  
248 growth was significantly improved with respect to salinity up to about 18%.  
249 Photosynthetic parameters were also measured at 0 days, and after 7 and 14 days after  
250 the start of the treatments, as stress physiological markers (**Figs. 1C-F**). In our  
251 experiments,  $CO_2$  assimilation rate was highly inhibited after 7 days under salinity as  
252 compared to control plants, with an inhibition of 50% at 7 days, and 70% at 14 days  
253 with respect to control plants (**Fig. 1C**). The other stress treatments applied (heat and  
254 salinity + heat) did not differ significantly with respect to the values obtained in control  
255 plants during the entire experiment, contrary to that observed under salinity. Control  
256 plants had a transpiration rate and a stomatal conductance that were practically constant



257 during the entire experiment, whereas plants subjected to heat and salinity + heat  
258 treatments showed a significant increase in transpiration rate (41%) and stomatal  
259 conductance (29%) at 7 days, which was maintained until the end of the experiment  
260 (**Figs. 1D and 1E**). Contrarily, the salinity treatment led to a significant reduction in the  
261 transpiration rate and the stomatal conductance at day 7 from the start of the treatment  
262 until the end. In this regard, the salinity + heat treatment showed a significant  
263 improvement in the photosynthetic parameters as compared to salinity alone. Curiously,  
264 no differences were found between salinity, heat, and the combination of both stresses  
265 for water use efficiency (WUE, **Fig. 1F**), but all the treatments showed a significant  
266 decrease in this parameter as compared to control plants.

267

### 268 **Salinity and heat combination induced a specific transcriptional response and** 269 **pathway activation**

270 An RNAseq study was performed to identify specific biochemical pathways or  
271 molecular functions that could explain the different physiological responses of the  
272 tomato plants to the salinity, heat, and salinity + heat treatments. RNA was sequenced  
273 from three biological replicates from each treatment, including control plants. A  
274 principal component analysis of the normalized reads revealed that all samples clustered  
275 according to treatment, which validated the unique transcriptional reprogramming caused  
276 by each stress condition (**Fig. 2A**). Then, a differential expression analysis was  
277 performed to determine the individual genes affected by each treatment when compared  
278 to the control. A total of 15,852 genes were found to be differentially expressed ( $P_{adj} <$   
279  $0.05$ ) across all three treatments (**Supplemental Table S6**). A comparison of both up-  
280 and down-regulated genes from each of the three treatments further confirmed that each  
281 treatment resulted in a high number of unique differentially expressed genes (**Fig. 2B**).  
282 Most notably, it was found that 1,388 (7.32% of the total) were differentially expressed  
283 only for salinity + heat, with 923 genes up-regulated and 465 genes down-regulated by  
284 this stress combination (**Fig. 2B**).

285 To identify important functions activated in response to each stress, an enrichment  
286 analysis of the significantly up-regulated genes was conducted using pathway  
287 annotations from the Kyoto Encyclopedia of Genes and Genomes (KEGG;  
288 **Supplemental Table S7**). A total of 27 pathways were found to be enriched ( $P_{adj} <$   
289  $0.05$ ) with these up-regulated genes across the three treatments (**Fig. 2C**). In line with

290 the genes themselves, enriched pathways were largely unique, with all but three  
291 pathways (glutathione metabolism (sly00480), protein processing in the ER (sly04141),  
292 and spliceosome (sly03040)) being enriched in just one of the three treatments. Most  
293 interestingly, the salinity + heat treatment resulted in the upregulation of genes  
294 belonging to two main metabolic pathways, ASC and aldarate metabolism (sly00053)  
295 and arginine and proline metabolism (sly00330), which were not enriched in either of  
296 the individual stress treatments, suggesting that the combination of stresses induced  
297 specific changes in plant metabolism that in turn led to variation in the physiological  
298 responses of the plants.

### 299 **The salinity and heat combination showed a unique metabolic profile with the** 300 **enrichment of specific pathways**

301 A metabolomics study was carried out to identify molecular features that were common  
302 or unique to the simple or combined stresses and to validate the RNAseq results. Our  
303 main interest mainly resided in those that were specifically accumulated under the  
304 combination of salinity and heat. A total of 3,338 molecular features showed significant  
305 ( $P_{adj} < 0.05$  and a  $\log_2 < -1$  or  $\log_2 > 1$ ) changes across the three stress conditions.  
306 Similar to the RNAseq analyses, each stress condition showed a unique metabolic  
307 profile (**Fig. 3A; Supplemental Tables S3 and S4**). Only 208 molecular features were  
308 commonly altered by all the treatments, which represented 6.30% of the total. When the  
309 combination of salinity and heat was applied, a total of 568 molecular features (17.19%  
310 of the total) were significantly and specifically accumulated with respect to the control  
311 (**Fig. 3B**). Salinity + heat caused reprogramming of multiple metabolic pathways,  
312 observed as a similar number of molecular features that were up- or down-regulated,  
313 337 and 208, respectively, when compared to the control (**Fig. 3C**). Pathway enrichment  
314 analysis of the up-regulated molecular features revealed that four biochemical pathways  
315 (i.e., ASC and aldarate metabolism, purine metabolism, arginine and proline  
316 metabolism and arginine biosynthesis) were significantly altered in tomato under the  
317 combination of salinity and heat (**Fig. 3D and Supplementary Table S4,**  
318 **Supplementary Figs. S2 and S3**). In agreement with the RNAseq data, the ASC and  
319 aldarate metabolism and the arginine and proline metabolism were among the most  
320 significantly enriched pathways.

321

322 **The integration of transcriptomics and metabolomics revealed that the proline and**  
323 **ASC pathways are interconnected for ROS homeostasis**

324 The RNAseq and metabolomics data was combined with measurements of enzymatic  
325 activity to obtain a detailed picture of the changes in the ASC and aldarate, and arginine  
326 and proline metabolic pathways caused by the combination of salinity and heat stresses  
327 (**Fig. 4**). The first observation was that proline appears to be degraded in favor of 4-  
328 hydroxyproline and L-glutamate-5-semialdehyde accumulation, with the concomitant  
329 up-regulation of prolyl 4-hydroxylase (P4HA) and pyrroline-5-carboxylate reductase  
330 (PROC), as well as the down-regulation of proline dehydrogenase (PRODH). The  
331 accumulation of L-glutamate-5-semialdehyde was also likely derived from ornithine  
332 through the up-regulation of arginase (ARG) and ornithine aminotransferase (ROCD).  
333 In summary, proline was not differentially accumulated under the combination of  
334 salinity + heat as compared to controls. Instead, 4-hydroxyproline and L-glutamate-5-  
335 semialdehyde, two proline-derivative compounds, significantly accumulated in tomato  
336 leaves under stress combination.

337 ASC significantly accumulated under combined salinity and heat stress in tomato. Its  
338 synthesis from UDP-glucose or myo-inositol results in the precursor D-glucuronate,  
339 which also increased under salinity + heat, in part due to the down-regulation of  
340 glucuronokinase transcript (GLCAK) through glucuronate-1P synthesis and to the up-  
341 regulation of one copy of the inositol oxygenase (MIOX). The levels of L-gulose and L-  
342 gulonate also increased under the combination of stresses, which seemed to favor ASC  
343 accumulation. The high ASC levels observed in tomato plants under stress combination  
344 could also be due to the degradation of the GDP-L-galactose and L-galactose-1P, since  
345 GDP-L-galactose phosphorylase (VTC2-5) and L-galactose 1-phosphate phosphatase  
346 (VTC4) were up-regulated under these conditions (**Fig. 4**). ASC is known to detoxify  
347 ROS through the Halliwell-Asada cycle. Remarkably, this pathway was highly  
348 represented among the differentially expressed genes and the significant molecular  
349 features altered by salinity + heat (**Figs. 2-3**). These results were also supported by the  
350 enzymatic activities of the proteins encoded by those transcripts (**Fig. 4**). Superoxide  
351 dismutases (SOD1 and SOD2), involved in cell ROS detoxification, were up-regulated  
352 at the transcript and activity levels, leading to the conversion of  $O_2^{\cdot -}$  to  $H_2O_2$ . Then,  
353  $H_2O_2$  can be detoxified by catalase (CAT) or by ASC peroxidase (APX) through the  
354 ASC/GSH pathway. CAT was not differentially expressed in the RNAseq analysis and

355 the enzyme activity was inhibited by stress combination. Several APX homologs were  
356 up-regulated at the transcript level and, more importantly, its enzymatic activity was  
357 very high ( $\log_2 = 1.97$ , **Supplemental Table S5**) under salinity + heat. The APX  
358 activity generates monodehydroascorbate, which accumulated significantly in our  
359 experiments. Monodehydroascorbate spontaneously forms dehydroascorbate, which is  
360 reduced to ASC, once again through the action of dehydroascorbate reductase (DHAR),  
361 using glutathione (GSH) as a reducing agent. Tomato plants showed a significant  
362 accumulation of glutathione and monodehydroascorbate under combined salinity and  
363 heat stress, with a non-significant dehydroascorbate accumulation or DHAR activity.  
364 However, the MDAR enzyme, responsible for the regeneration of ASC, was up-  
365 regulated at the transcript and enzymatic levels. Lastly, the glutathione peroxidases  
366 GPX and PhGPX, responsible for the recovery of lipid peroxidation, were also up-  
367 regulated under stress combination. Our results are indicative of a connection between  
368 ASC synthesis and oxidative stress-proline metabolism, with the intersection between  
369 these pathways found at the 1-pyrroline-5-carboxylate level (**Fig. 4**).

370

#### 371 **Plants subjected to salinity and heat combination showed lower oxidative damage** 372 **than those under salinity alone**

373 The proposed coordination between the proline, ASC, and redox pathways may improve  
374 the ability of the tomato plants to deal with ROS detoxification. Markers of oxidative  
375 stress were evaluated to determine if tomato plants subjected to stress combination  
376 displayed a more efficient antioxidant system than those plants grown under individual  
377 stresses (**Fig. 5**). Tomato plants under salinity had the highest levels of  $H_2O_2$ , with a  
378 significant 4-fold increase compared to control plants. However, when salinity and heat  
379 were applied in combination, it was found that the  $H_2O_2$  content was about 50% lower  
380 than in the salinity treatment (**Fig. 5A**). A similar trend was observed for lipid  
381 peroxidation, an indicator of oxidative damage to cell membranes, with a maximum  
382 value found for salinity stress, and an intermediate value found for the salinity + heat  
383 stress combination (**Fig. 5B**). Thus, the stress combination appears to reduce oxidative  
384 damage with respect to the salinity treatment. In neither case, the differences between  
385 heat stress and control were statistically significant. Interestingly, the antioxidant  
386 capacity (**Fig. 5C**) obtained for plants subjected to salinity was the lowest among all  
387 treatments, with a reduction of up to 90% as compared to the controls. When salinity

388 and heat were combined, the antioxidant capacity index was significantly lower than the  
389 control but 6-fold higher than salinity. Again, the heat treatment did not show  
390 significant differences with respect to the control. Protein oxidation values obtained for  
391 the four stress conditions were directly related to H<sub>2</sub>O<sub>2</sub> and lipid peroxidation, with a  
392 positive and significant correlation (H<sub>2</sub>O<sub>2</sub>-protein oxidation:  $r = 0.992$ ,  $P_{adj} < 0.001$ ;  
393 lipid peroxidation-protein oxidation:  $r = 0.996$ ,  $P_{adj} < 0.001$ ). In short, our results  
394 indicated that ROS levels were lower when salinity and heat were applied jointly as  
395 compared to the salinity treatment alone, which was directly observed as a lower  
396 damage to the membrane lipids and to the cellular proteins under abiotic stress  
397 combination.

398

### 399 **The combined salinity and heat responses are associated with the upregulation of** 400 **unique transcription factors families**

401 The high specificity of the tomato plant responses to salinity + heat suggests that a tight  
402 regulatory control must be in place to rapidly and efficiently cope with the oxidative  
403 damage caused by these conditions. TFs are known to be key players in modulating the  
404 expression of genes involved in abiotic stress responses. TFs that may regulate the  
405 transcriptional responses to salinity, heat, and/or salinity + heat were identified by  
406 evaluating the promoter regions (1000 bp upstream from the transcription start site) of  
407 up-regulated genes from each stress condition for overrepresented cis-element motifs  
408 (**Fig. 6A**). Binding sites from a total of 46 TFs belonging to multiple gene families were  
409 found to be enriched ( $P_{adj} < 0.05$ ) across all treatments. Of these, only 9 TFs were  
410 associated with all stress conditions (salinity, heat, and salinity + heat), including three  
411 Homeobox-Homeodomain-Leucine Zipper Protein (HB-HD-ZIP) TFs identified. The  
412 salinity + heat treatment exhibited five unique TFs, including three from the stress-  
413 related Zinc Finger Cysteine-2/Histidine-2 (C2H2) family.

414 In contrast to the diverse enrichment results, most enriched TFs did not exhibit  
415 significant up-regulation themselves under their associated stress condition. For salinity  
416 + heat, only three TFs had significant ( $P_{adj} < 0.05$ ) expression levels when compared to  
417 the controls (**Fig. 6B**). These TFs, one each from the basic Leucine Zipper Domain  
418 (bZIP), C2H2, and HB-HD-ZIP families, were also all differentially expressed in the  
419 salinity treatment, although the bZIP TF (*Solyc04g078840*) was down-regulated under  
420 this treatment, and up-regulated exclusively for salinity + heat. None of these three were

421 differentially expressed under the heat stress alone. The sequences of the differentially  
422 expressed genes from the proline, ASC, and redox pathways (**Fig. 4**) were evaluated to  
423 determine which of the overrepresented cis-element motifs associated with salinity +  
424 heat were present in their promoters (**Fig. 6A**). Most of these genes include binding sites  
425 for TFs from the Apetala 2 (AP2), Dof zinc finger protein (C2C2-Dof), and Cysteine-  
426 rich Polycomb-like Protein (CPP) families, among others. Binding sites for the single  
427 CPP TF, which were highly enriched across all three stress conditions, matched to the  
428 promoters of genes from the proline, ASC, and oxidative metabolism pathways,  
429 including all four up-regulated copies of *APX* genes. Remarkably, binding sites for the  
430 single-enriched Trihelix TF, *Solyc11g012720*, were found only in the promoters of  
431 proline metabolism genes. Ultimately, these results suggest that specific sets of TFs  
432 coordinate the modulation of proline, ASC, and redox metabolism under salinity + heat  
433 stress, which should be further studied to validate their direct or indirect regulatory  
434 roles.

435

## 436 **DISCUSSION**

437 In the present study, we demonstrated that the combination of heat stress with moderate  
438 salinity in tomato plants induced a specific physiological, biochemical, and molecular  
439 response that could not be deduced from a single stress application. From the  
440 physiological stand point, tomato plants under the combination of salinity and heat grew  
441 better than when salinity was applied as a sole stress, showing a significant increase in  
442 plant biomass. At the same line, plants under stress combination showed better  
443 photosynthetic performance and lower cellular oxidation than those growing under  
444 salinity, with the balance between these two processes necessary for both plant growth  
445 and adaptation to abiotic stress (Considine and Foyer, 2013; Woehle *et al.*, 2017).  
446 Under salinity stress, ROS accumulation (measured as  $H_2O_2$ ) likely induced damage to  
447 membranes and an increase in protein oxidation, which translated into a lower cell  
448 antioxidant capacity. These oxidative stress-associated processes may have caused the  
449 strong inhibition of photosynthesis and reduction of growth observed in plants subjected  
450 to the salinity treatment. Interestingly, when salinity was combined with heat, ROS  
451 were accumulated to a lesser extent, with the damage to membranes and proteins being  
452 also lower and maintaining an antioxidant capacity of over 60%, which was observed as  
453 plants with better growth rates than in the salinity conditions alone. These observations

454 indicate that ROS could be produced in a lower quantity under stress combination than  
455 under salinity, and that ROS is being produced at the same level than under salinity,  
456 although their detoxification may be more efficient and/or effective under stress  
457 combination. Our results mainly support the latter possibility, in which the combination  
458 of salinity and heat induced the reprogramming of some important stress-related  
459 pathways, such as proline and ASC metabolism, facilitating their interconnectivity for a  
460 more efficient cellular ROS detoxification through the activation of oxidative  
461 metabolism.

462 Tomato plant responses to salinity and heat combination involved complex  
463 transcriptional networks and changes in metabolic fluxes. However, the modulation of  
464 the proline and ASC pathways was shown to be a strong and unique response to this  
465 stress combination. Interestingly, these metabolic pathways were not found to be  
466 significantly induced under salinity or heat when applied individually. Proline can  
467 protect cells from damage by acting as an osmoprotectant but also as a ROS scavenger  
468 (Szabados and Saviouré, 2010; Narayanan and Govindarajan, 2012). Although proline  
469 metabolism was induced under the combination of salinity and heat, proline levels did  
470 not increase under these conditions, and instead, the derivatives 4-hydroxyproline and  
471 L-glutamate-5-semialdehyde were significantly accumulated. Several studies have  
472 pointed out that during stress recovery, proline is oxidized to provide the cell with a  
473 large amount of energy (one molecule of proline captures 30 ATP equivalents)  
474 (Verbruggen and Hermans, 2008; Zhang and Becker, 2015). Jaspers and Kangasjärvi  
475 (2010) showed that when salinity levels were increased, proline was used as a source of  
476 energy by plants, providing ATP and NADPH through its catalysis by the enzyme  
477 PRODH. This oxidation process increased the formation of ROS, activating the  
478 response signaling cascade generated by the oxidative stress (Jaspers and Kangasjärvi,  
479 2010), and thus relating proline with the stress response mechanisms found in plants.

480 Our results pointed out to an interconnection between proline catalysis, ROS generation  
481 (due to stress conditions and proline degradation) and an upregulation of the oxidative  
482 metabolism. ASC metabolism was also up-regulated, as ASC is a necessary substrate to  
483 maintain oxidative metabolism active. It can be suggested that proline accumulation  
484 occurs early during the acclimation to stress combination and that its oxidation is a sign  
485 of stress recovery in these plants. However, we have previously reported that proline  
486 does not preferentially accumulate during the first 72 hours after tomato plants were



487 subjected to the combination of salinity and heat stress (Rivero *et al.*, 2014), which  
488 contradicts this idea. Instead, glycine-betaine was the osmolyte that was preferentially  
489 accumulated in tomato under these conditions. Thus, in this study, we propose and  
490 provide evidence that proline oxidation may be interconnected with glutathione redox  
491 homeostasis for efficient ROS scavenging. Recent publications have demonstrated that  
492 proline catabolism to P5C is induced in animal cells during cell infection (Tang and  
493 Pang, 2016). These authors proposed that PRODH and PROC act together to raise P5C  
494 levels and thus, govern ROS homeostasis. This mechanism is largely unknown in  
495 plants, although a similar hypothesis was proposed in *Arabidopsis thaliana* as a  
496 response to pathogen attack (Qamar *et al.*, 2015). In a previous study by our research  
497 group (Rivero *et al.*, 2014) we have also shown that PRODH and PROC were  
498 differentially up-regulated at the gene and protein levels under the combination of  
499 salinity and heat, whereas under salinity or heat applied individually these enzymes  
500 were down-regulated, thereby favoring proline accumulation. The significant  
501 enrichment of proline metabolism found in the analysis of the transcriptomics and  
502 metabolomics data and the potential role of proline intermediaries in ROS homeostasis,  
503 such as P5C, provide a strong argument for the role of proline oxidation in ROS  
504 signaling mechanisms under stress combination; however, we recognize that more  
505 research is needed to confirm this hypothesis.

506 ASC is one of the main compounds involved in plant oxidative metabolism through the  
507 Halliwell-Asada cycle, and genes and compounds found in this pathway were  
508 significantly induced under salinity and heat combination. Activities of the oxidative  
509 metabolism-related enzymes were determined to confirm the upregulation of the  
510 oxidative metabolism at the protein level, as well as to find whether or not this pathway  
511 was specifically regulated under the combination of salinity and heat, as previously  
512 shown for proline and ASC metabolism. Our research group, as well as other authors,  
513 have reported on the high activation of oxidative metabolism-related enzymes through a  
514 specific upregulation under the combination of salinity in tomato plants (Rivero *et al.*,  
515 2014; Martinez *et al.*, 2018; García-Martí *et al.*, 2019). The enzymatic activities  
516 assayed, together with the gene expression and the metabolites identified in our study,  
517 indicate the efficient detoxification of H<sub>2</sub>O<sub>2</sub> through the Halliwell-Asada cycle, and a  
518 very active lipid recovery from oxidation thanks to PhGPX activity. These observations  
519 could explain that under salinity and heat combination, the oxidative markers measured



520 (H<sub>2</sub>O<sub>2</sub>, lipid peroxidation, protein oxidation, and antioxidant capacity) in tomato plants  
521 were lower than under salinity as the sole stress.

522 Zandalinas *et al.* (2020) recently described that different combinations of abiotic  
523 stresses applied to *A. thaliana* plants resulted in unique transcriptional profiles and that  
524 their regulation by different TF families was also characteristic of each stress  
525 combination. In this report, the bHLH, MYB and bZIP TFs families were significantly  
526 induced under the combination of salinity and heat. Our results showed that some genes  
527 belonging to the bZIP TF family were differentially and uniquely regulated under the  
528 combination of salinity and heat in tomato plants (e.g., *Solyc10g081350*). Other TFs  
529 belonging to other stress-related families, such as C2H2 (e.g., *Solyc02g085580*,  
530 *Solyc03g121660*, *Solyc07g053570*) and Trihelix (e.g., *Solyc11g012720*), also showed  
531 this particularity under our experimental conditions. Most of these TFs families have  
532 been reported to be involved in the control of plant development, cell division, different  
533 physiological process, but also in abiotic responses of plants (Kaplan-Levy *et al.*, 2014;  
534 Agarwal *et al.*, 2019). For example, Agarwal *et al.* (2019) reported that the bZIP family  
535 was involved in the mitigation of several abiotic stresses (e.g., salinity, drought, heat or  
536 oxidative stress) and the increase in plant productivity under adverse conditions. The  
537 Trihelix TF family has been shown to be involved in the response to salinity and  
538 pathogen-related stresses, and in the development of trichomes, stomata, and the seed  
539 abscission layer (Kaplan-Levy *et al.*, 2014). Numerous members of the C2H2-type zinc  
540 finger family have been shown to play a significant role in the plant's response to  
541 different abiotic stresses and in plant hormonal transduction signals (Kiełbowicz-Matuk,  
542 2012). Most of the information found in the literature regarding the C2H2 family has  
543 been for *Arabidopsis*, and very little is known about other plant species, including  
544 tomato. Hu *et al.* (2019) found that this family regulates many genes in response to  
545 some abiotic stress, and especially in response to heat stress in tomato plants. Most of  
546 the C2H2 genes that were up-regulated under heat stress in the report by Hu *et al.*  
547 (2019) were also differentially expressed in our transcriptomic analysis when heat was  
548 applied as the sole stress. However, the C2H2 identified in our study that was  
549 specifically up-regulated under salinity + heat was not listed in the study by Hu *et al.*  
550 (2019), again demonstrating the importance of studying stresses in combination. The  
551 TFs identified as being up-regulated under the combination of salinity and heat aligned

552 with the promoter regions of many genes studied in this report, including those  
553 belonging to the proline, ASC, and oxidative metabolisms.

554 In summary, we showed that proline, ASC and oxidative metabolism are  
555 interconnected, with a tight coordination to maintain not only an optimal cellular redox  
556 balance, but also to trigger the proper signaling mechanisms responsible for inducing  
557 the plant's acclimation to the combination of salinity and heat. In this process, proline  
558 oxidation is suggested to be used as the energy source needed for triggering the stress  
559 response, with subsequent ROS formation. At this point, oxidative metabolism enters  
560 the stage, with the upregulation of its main enzymes to maintain ROS at basal levels.  
561 One of the main limiting factors for maintaining the activity of the redox metabolic  
562 pathways is ASC abundance, which suggests the presence of a connection between ASC  
563 biosynthesis with oxidative metabolism and, most likely, with proline oxidation.  
564 Cellular basal levels of ROS could trigger downstream signaling mechanisms through  
565 the activation of particular TFs families, such as the trihelix, C2H2 and bZIP families,  
566 which in turn, may regulate the expression of genes involved in the reprogramming of  
567 different metabolic pathways, including those involved in proline, ASC, and redox  
568 metabolism (i.e., positive feedback loops). Future validation of the role of specific TFs  
569 families in the successful acclimation of plants to heat + salinity is necessary for  
570 developing breeding strategies for more resilient crops against abiotic stresses.

571

#### 572 **Supplementary data**

573 **Figure S1.** Total ion chromatogram extracted from UPLC-QTOF performed in 6  
574 biological replications of tomato leaves subjected to control, salinity heat or the  
575 combination of salinity + heat.

576 **Figure S2.** Box-and-whisker plots of the compounds belong to the Ascobate, Alderate  
577 and oxidative metabolism with significant differences between salinity + heat treatment  
578 respect to control.

579 **Figure S3.** Box-and-whisker plots of the compounds belong to the Proline metabolism  
580 with significant differences between salinity + heat treatment respect to control.

581 **Table S1.** Raw, parsed and mapped reads of mRNA of all samples.

582 **Table S2 - Sheet 1-** Comparison of salinity treated tomato plants against control plants.

583 **Sheet 2-** Comparison of heat treated tomato plants against control plants. **Sheet 3-**

584 **Comparison of the salinity combined with heat treatment against control plants.**

585 **Table S3.** Comparison of the peaks of each independent analysis with the aim of find  
586 common and specific peaks among all the treatments.

587 **Table S4.** Identified compounds in the Control vs Salinity+Heat peaks comparison  
588 related to the enriched pathway analysis results.

589 **Table S5.** Activities of the oxidative metabolism-related enzymes.

590 **Table S6.** Differential expression output from DESeq2 (Love et al., 2014).

591 **Table S7.** Enrichment of KEGG pathways in upregulated genes for each treatment.

592

593 **Data availability:** The raw sequencing reads and the read mapping count matrices are  
594 available in the National Center for Biotechnology Information Gene Expression  
595 Omnibus database under the accession GSE152620. All data supporting the findings of  
596 this study are available within the paper and within its supplementary materials  
597 published online.

598

### 599 **Acknowledgements**

600 This work was supported by the Ministry of Economy and Competitiveness from Spain  
601 (Grant No. PGC2018-09573-B-100) to R.M.R (Murcia, Spain), by the Ministry of  
602 Science, Innovation and Universities of Spain (Grant No. FPU16/05265) to M.L-D.  
603 (Murcia, Spain) and by start-up funds from the College of Agricultural and  
604 Environmental Sciences and the Department of Plant Sciences (UC Davis) to B.B-U  
605 (Davis, CA, United States). We sincerely acknowledge Mario G. Fon for proof-reading  
606 the manuscript. We also thank the Metabolomics Core of CEBAS-CSIC for the  
607 assistance with the analysis. All authors declare no commercial, industrial links or  
608 affiliations.

609

### 610 **Author contribution**

611 RMR conceived, designed and supervised the experiments; ML-D, CJS and BB-U  
612 performed the RNAseq analysis. VM and RMR performed the metabolomic analysis.  
613 ML-D, TCM and RMR performed the biochemical analysis. ML-D and RMR  
614 performed the photosynthetic measurements. ML-D, BB-U and RMR wrote the paper.  
615 The authors declare that they have no competing interests.

616

### 617 **References**

- 618 **Aebi H.** 1984. Catalase in Vitro. *Methods in Enzymology* **105**, 121–126.
- 619 **Agarwal P, Baranwal VK, Khurana P.** 2019. Genome-wide Analysis of bZIP  
620 Transcription Factors in wheat and Functional Characterization of a TabZIP under  
621 Abiotic Stress. *Scientific Reports* **9**, 4608.
- 622 **Akram NA, Shafiq F, Ashraf M.** 2017. Ascorbic acid-a potential oxidant scavenger  
623 and its role in plant development and abiotic stress tolerance. *Frontiers in Plant Science*  
624 **8**.
- 625 **Anjum SA, Xie X-Y, Wang L-C, Saleem MF, Man C, Lei W.** 2019. Morphological,  
626 physiological and biochemical responses of plants to drought stress. *African Journal of*  
627 *Agricultural Research* **6**.
- 628 **Benjamini Y, Hochberg Y.** 1995. Controlling the False Discovery Rate: A Practical  
629 and Powerful Approach to Multiple Testing. *Journal of the Royal Statistical Society:*  
630 *Series B (Methodological)* **57**, 289–300.
- 631 **Bolger AM, Lohse M, Usadel B.** 2014. Trimmomatic: a flexible trimmer for Illumina  
632 sequence data. *Bioinformatics (Oxford, England)* **30**, 2114–2120.
- 633 **Bradford MM.** 1976. A rapid and sensitive method for the quantitation of microgram  
634 quantities of protein utilizing the principle of protein-dye binding. *Analytical*  
635 *Biochemistry* **72**, 248–254.
- 636 **Castelán-Muñoz N, Herrera J, Cajero-Sánchez W, Arrizubieta M, Trejo C,**  
637 **García-Ponce B, Sánchez M de la P, Álvarez-Buylla ER, Garay-Arroyo A.** 2019.  
638 MADS-box genes are key components of genetic regulatory networks involved in  
639 abiotic stress and plastic developmental responses in plants. *Frontiers in Plant Science*  
640 **10**.
- 641 **Considine MJ, Foyer CH.** 2013. Redox Regulation of Plant Development.  
642 *Antioxidants & Redox Signaling* **21**, 1305–1326.
- 643 **Foyer CH, Noctor G.** 2011. Ascorbate and glutathione: The heart of the redox hub.  
644 *Plant Physiology* **155**, 2–18.
- 645 **Fu J, Huang B.** 2001. Involvement of antioxidants and lipid peroxidation in the  
646 adaptation of two cool-season grasses to localized drought stress. *Environmental and*  
647 *Experimental Botany* **45**, 105–114.
- 648 **García-Martí M, Piñero MC, García-Sánchez F, Mestre TC, López-Delacalle M,**  
649 **Martínez V, Rivero RM.** 2019. Amelioration of the Oxidative Stress Generated by  
650 Simple or Combined Abiotic Stress through the K<sup>+</sup> and Ca<sup>2+</sup> Supplementation in

- 651 Tomato Plants. *Antioxidants* **8**, 81.
- 652 **Halliwell B, Foyer CH.** 1976. *Ascorbic Acid, Metal Ions and the Superoxide Radical.*
- 653 **Hoagland DR, Arnon DI.** 1950. The water-culture method for growing plants without  
654 soil. Circular. California Agricultural Experiment Station **347**.
- 655 **Hu X, Zhu L, Zhang Y, Xu L, Li N, Zhang X, Pan Y.** 2019. Genome-wide  
656 identification of C2H2 zinc-finger genes and their expression patterns under heat stress  
657 in tomato (*Solanum lycopersicum* L.) (G Sun, Ed.). *PeerJ* **7**, e7929.
- 658 **Jaspers P, Kangasjärvi J.** 2010. Reactive oxygen species in abiotic stress signaling.  
659 *Physiologia Plantarum* **138**, 405–413.
- 660 **Kaplan-Levy RN, Quon T, O'Brien M, Sappl PG, Smyth DR.** 2014. Functional  
661 domains of the PETAL LOSS protein, a trihelix transcription factor that represses  
662 regional growth in *Arabidopsis thaliana*. *The Plant Journal* **79**, 477–491.
- 663 **Kielbowicz-Matuk A.** 2012. Involvement of plant C2H2-type zinc finger transcription  
664 factors in stress responses. *Plant Science* **185–186**, 78–85.
- 665 **Koleva II, van Beek TA, Linssen JPH, Groot A de, Evstatieva LN.** 2002. Screening  
666 of Plant Extracts for Antioxidant Activity: a Comparative Study on Three Testing  
667 Methods. *Phytochemical Analysis* **13**, 8–17.
- 668 **Kollist H, Zandalinas SI, Sengupta S, Nuhkat M, Kangasjärvi J, Mittler R.** 2019.  
669 Rapid Responses to Abiotic Stress: Priming the Landscape for the Signal Transduction  
670 Network. *Trends in Plant Science* **24**, 25–37.
- 671 **Langmead B, Salzberg SL.** 2012. Fast gapped-read alignment with Bowtie 2. *Nature*  
672 *methods* **9**, 357–359.
- 673 **Lopez-Delacalle M, Camejo D, ... MG-M-F in P, 2019 U.** 2020. Using tomato  
674 recombinant lines to improve plant tolerance to stress combination through a more  
675 efficient nitrogen metabolism. *Frontiers*.
- 676 **Love MI, Huber W, Anders S.** 2014. Moderated estimation of fold change and  
677 dispersion for RNA-seq data with DESeq2. *Genome Biology* **15**, 550.
- 678 **MacNevin WM, Urone PF.** 1953. Separation of Hydrogen Peroxide from Organic  
679 Hydroperoxides. *Analytical Chemistry* **25**, 1760–1761.
- 680 **Martinez V, Mestre TC, Rubio F, Girones-Vilaplana A, Moreno DA, Mittler R,**  
681 **Rivero RM.** 2016. Accumulation of flavonols over hydroxycinnamic acids favors  
682 oxidative damage protection under abiotic stress. *Frontiers in Plant Science* **7**.
- 683 **Martinez V, Nieves-Cordones M, Lopez-Delacalle M, Rodenas R, Mestre TC,**

- 684 **Garcia-Sanchez F, Rubio F, Nortés PA, Mittler R, Rivero RM.** 2018. Tolerance to  
685 stress combination in tomato plants: New insights in the protective role of melatonin.  
686 *Molecules* **23**, 1–20.
- 687 **McCord JM FI.** 1969. The utility of superoxide Dismutase in studying free Radicals  
688 Reactions. *The Journal of biological chemistry* **244**, 6056 – 63.
- 689 **McLeay RC, Bailey TL.** 2010. Motif Enrichment Analysis: a unified framework and  
690 an evaluation on ChIP data. *BMC Bioinformatics* **11**, 165.
- 691 **Meyer AJ.** 2008. The integration of glutathione homeostasis and redox signaling.  
692 *Journal of Plant Physiology* **165**, 1390–1403.
- 693 **Miller G, Suzuki N, Ciftci-Yilmaz S, Mittler R.** 2010. Reactive oxygen species  
694 homeostasis and signalling during drought and salinity stresses. *Plant, Cell and*  
695 *Environment* **33**, 453–467.
- 696 **Mittler R.** 2006. Abiotic stress, the field environment and stress combination. *Trends in*  
697 *Plant Science*.
- 698 **Miyake C, Asada K.** 1992. Thylakoid-Bound Ascorbate Peroxidase in Spinach  
699 Chloroplasts and Photoreduction of Its Primary Oxidation Product  
700 Monodehydroascorbate Radicals in Thylakoids. *Plant and Cell Physiology* **33**, 541–553.
- 701 **Moriya Y, Itoh M, Okuda S, Yoshizawa AC, Kanehisa M.** 2007. KAAS: an  
702 automatic genome annotation and pathway reconstruction server. *Nucleic Acids*  
703 *Research* **35**, W182–W185.
- 704 **Narayanan N, Govindarajan SK.** 2012. Natarajan. N., and G. Suresh Kumar. (2012).  
705 “Effect of non linear sorption on multi-species solute transport in a coupled fracture  
706 matrix system”. *International Journal of Research in Chemistry and Environment*  
707 (ISSN: 2248-9649), Vol. 2(2), pp. 96-101. *International Journal of Research in*  
708 *Chemistry and Environment* **2**, 96–101.
- 709 **Nieves-Cordones M, López-Delacalle M, Ródenas R, Martínez V, Rubio F, Rivero**  
710 **RM.** 2019. Critical responses to nutrient deprivation: A comprehensive review on the  
711 role of ROS and RNS. *Environmental and Experimental Botany* **161**, 74–85.
- 712 **Noctor G, Foyer CH.** 1998. ASCORBATE AND GLUTATHIONE: Keeping Active  
713 Oxygen Under Control. *Annual Review of Plant Physiology and Plant Molecular*  
714 *Biology* **49**, 249–279.
- 715 **Qamar A, Mysore KS, Senthil-Kumar M.** 2015. Role of proline and pyrroline-5-  
716 carboxylate metabolism in plant defense against invading pathogens. *Frontiers in plant*

- 717 science **6**, 503.
- 718 **Reznick AZ, Packer L.** 1994. [38] Oxidative damage to proteins: Spectrophotometric  
719 method for carbonyl assay. *Methods in Enzymology*. Academic Press, 357–363.
- 720 **Rivera A, Bravo C, Buob G.** 2017. *Climate Change and Land Ice*.
- 721 **Rivero RM, Mestre TC, Mittler R, Rubio F, Garcia-Sanchez F, Martinez V.** 2014.  
722 The combined effect of salinity and heat reveals a specific physiological, biochemical  
723 and molecular response in tomato plants. *Plant, Cell and Environment* **37**, 1059–1073.
- 724 **Rivero RM, Ruiz JM, Romero L.** 2004a. Oxidative metabolism in tomato plants  
725 subjected to heat stress. *Journal of Horticultural Science and Biotechnology* **79**, 560–  
726 564.
- 727 **Rivero RM, Ruiz JM, Romero LM.** 2004b. Importance of N source on heat stress  
728 tolerance due to the accumulation of proline and quaternary ammonium compounds in  
729 tomato plants. *Plant Biology* **6**, 702–707.
- 730 **Sayed HESA El.** 2013. Exogenous application of ascorbic acid for improve  
731 germination, growth, water relations, organic and inorganic components in tomato  
732 (*Lycopersicon esculentum* Mill.). *New York Science Journal* **6**, 123–139.
- 733 **Schmidt R, Schippers JHM, Welker A, Mieulet D, Guiderdoni E, Mueller-Roeber**  
734 **B.** 2012. Transcription factor *osh5fc1b* regulates salt tolerance and development in  
735 *oryza sativa* ssp. *japonica*. *AoB PLANTS* **12**.
- 736 **Sehgal A, Sita K, Bhandari K, Kumar S, Kumar J, Vara Prasad P V, Siddique**  
737 **KHM, Nayyar H.** 2019. Influence of drought and heat stress, applied independently or  
738 in combination during seed development, on qualitative and quantitative aspects of  
739 seeds of lentil (*Lens culinaris* Medikus) genotypes, differing in drought sensitivity.  
740 *Plant Cell and Environment* **42**, 198–211.
- 741 **Shalata A, Neumann PM.** 2001. Exogenous ascorbic acid (vitamin C) increases  
742 resistance to salt stress and reduces lipid peroxidation. *Journal of Experimental Botany*  
743 **52**, 2207–2211.
- 744 **Suzuki N, Koussevitzky S, Mittler R, Miller G.** 2012. ROS and redox signalling in  
745 the response of plants to abiotic stress. *Plant, Cell and Environment* **35**, 259–270.
- 746 **Szabados L, Savouré A.** 2010. Proline: a multifunctional amino acid. *Trends in Plant*  
747 *Science* **15**, 89–97.
- 748 **Tang H, Pang S.** 2016. Proline Catabolism Modulates Innate Immunity in  
749 *Caenorhabditis elegans*. *Cell Reports* **17**, 2837–2844.



750 **Torres CA, Andrews PK, Davies NM.** 2006. Physiological and biochemical responses  
751 of fruit exocarp of tomato (*Lycopersicon esculentum* Mill.) mutants to natural photo-  
752 oxidative conditions. *Journal of Experimental Botany*.1933–1947.

753 **Verbruggen N, Hermans C.** 2008. Proline accumulation in plants: a review. *Amino*  
754 *Acids* **35**, 753–759.

755 **Woehle C, Dagan T, Landan G, Vardi A, Rosenwasser S.** 2017. Expansion of the  
756 redox-sensitive proteome coincides with the plastid endosymbiosis. *Nature Plants* **3**,  
757 17066.

758 **Zandalinas SI, Fritschi FB, Mittler R, Lawson T.** 2020. Signal transduction networks  
759 during stress combination. *Journal of Experimental Botany* **71**, 1734–1741.

760 **Zhang L, Becker D.** 2015. Connecting proline metabolism and signaling pathways in  
761 plant senescence. *Frontiers in Plant Science* **6**, 552.

762 **Zushi K, Ono M, Matsuzoe N.** 2014. Light intensity modulates antioxidant systems in  
763 salt-stressed tomato (*Solanum lycopersicum* L. cv. Micro-Tom) fruits. *Scientia*  
764 *Horticulturae* **165**, 384–391.

765

766

## 767 **Figure Legends**

768 **Figure 1. (A)** Pictures of tomato plants at the end of the control or stress treatments. **(B)**

769 Whole plant fresh weight (FW) of tomato plants grown under control, heat, salinity  
770 or the combination of salinity and heat. **(C-F)** Photosynthetic parameters measured  
771 in the third and four fully mature expanded leaves of tomato plants grown under  
772 control or stress conditions measured at the beginning (0 days), during (7 days) or  
773 at the end (14 days) of the treatments. Values represent means  $\pm$  SE (n = 9). Bars  
774 with different letters within each panel are significantly different at  $p < 0.05$   
775 according to Tukey's test.

776 **Figure 2.** RNAseq analysis performed in tomato leaves after 14 days of growing under  
777 control or stress (salinity, heat or the combination of salinity and heat) conditions.

778 **(A)** Principal component analysis (PCA) of the normalized reads obtained for each  
779 treatment. **(B)** Euler diagram representing up- and down-regulated genes (adjusted  
780  $P < 0.05$ ) of tomato plants grown under control, simple (salinity or heat) or  
781 combined (salinity + heat) stress. **(C)** Pathway enrichment analysis performed  
782 within the up-regulated genes under the different stress conditions applied. More



783 details on these analyses can be found in the Materials and Method section.

784 **Figure 3.** Metabolomic analysis performed in tomato leaves after 14 days of growing  
785 under control, simple (salinity or heat) or combined (salinity + heat) stress  
786 conditions. **(A)** Principal component analysis (PCA) of the normalized molecular  
787 features found under each treatment applied ( $n = 6$ ). **(B)** Euler diagram of the  
788 common and uniquely molecular features with a differential and significant  
789 accumulation in each treatment ( $P_{adj} < 0.05$ ). **(C)** Bubble diagram representing the  
790 up- and down-regulated molecular features found among the 568 molecular  
791 features uniquely and significantly changing under the combination of salinity +  
792 heat. Each bubble (i.e. molecular feature) is positioned in the chromatogram by its  
793 mass-to-charge (y-axis) and retention time (x-axis) and the size and darkness of  
794 one bubble represented the  $\log_2$  and p-value, respectively of this molecular feature.  
795 The raw data of Figure 3C can be found in the supplemental material  
796 (Supplementary Table S2 and S3). **(D)** KEGG pathway enrichment analysis  
797 performed with the significantly up-regulated molecular features identified under  
798 the combination of salinity + heat. More details on these analyses can be found in  
799 the Materials and Methods section.

800 **Figure 4.** Schematic diagram of the metabolic interconnection between ascorbate,  
801 proline and oxidative metabolism in tomato plants.  $\log_2$ (fold change) of the  
802 metabolite concentration ( $\circ$ ), gene expression ( $\square \square$ ) or enzymatic activity ( $\diamond$ )  
803 obtained in tomato plants grown under the combination of salinity + heat after  
804 RNAseq, metabolomics or biochemical analyses were represented.

805 **Figure 5.** Oxidative metabolism-related markers measured in tomato leaves grown for  
806 14 days under control, simple (salinity +heat) or combined (salinity+heat) stress.  
807 Values represent means  $\pm$  SE ( $n = 9$ ). Bars with different letters within each panel  
808 are significantly different at  $p < 0.05$  according to Tukey's test.

809 **Figure 6.** Cis-element enrichment results for up-regulated genes from each stress  
810 treatment. **(A)** Enrichment p-values for binding motifs corresponding to 46 TFs in  
811 each of the stress treatments. TFs are grouped and color coded by family, and a  
812 consensus diagram for the binding motif and gene accession is given for each. **(B)**  
813  $\log_2$ (fold change) of expression of three selected TFs in each stress treatment. **(C)**  
814 Counts of TF families overrepresented in genes up-regulated in the salinity + heat  
815 treatment from the ascorbate metabolism, oxidative metabolism, and proline

816 metabolism families. Accessions and common abbreviations are given for each  
817 gene. Numbers in boxes refer to the count of TFs in that family with a match to  
818 that gene based on Analysis of Motif Enrichment results.  
819

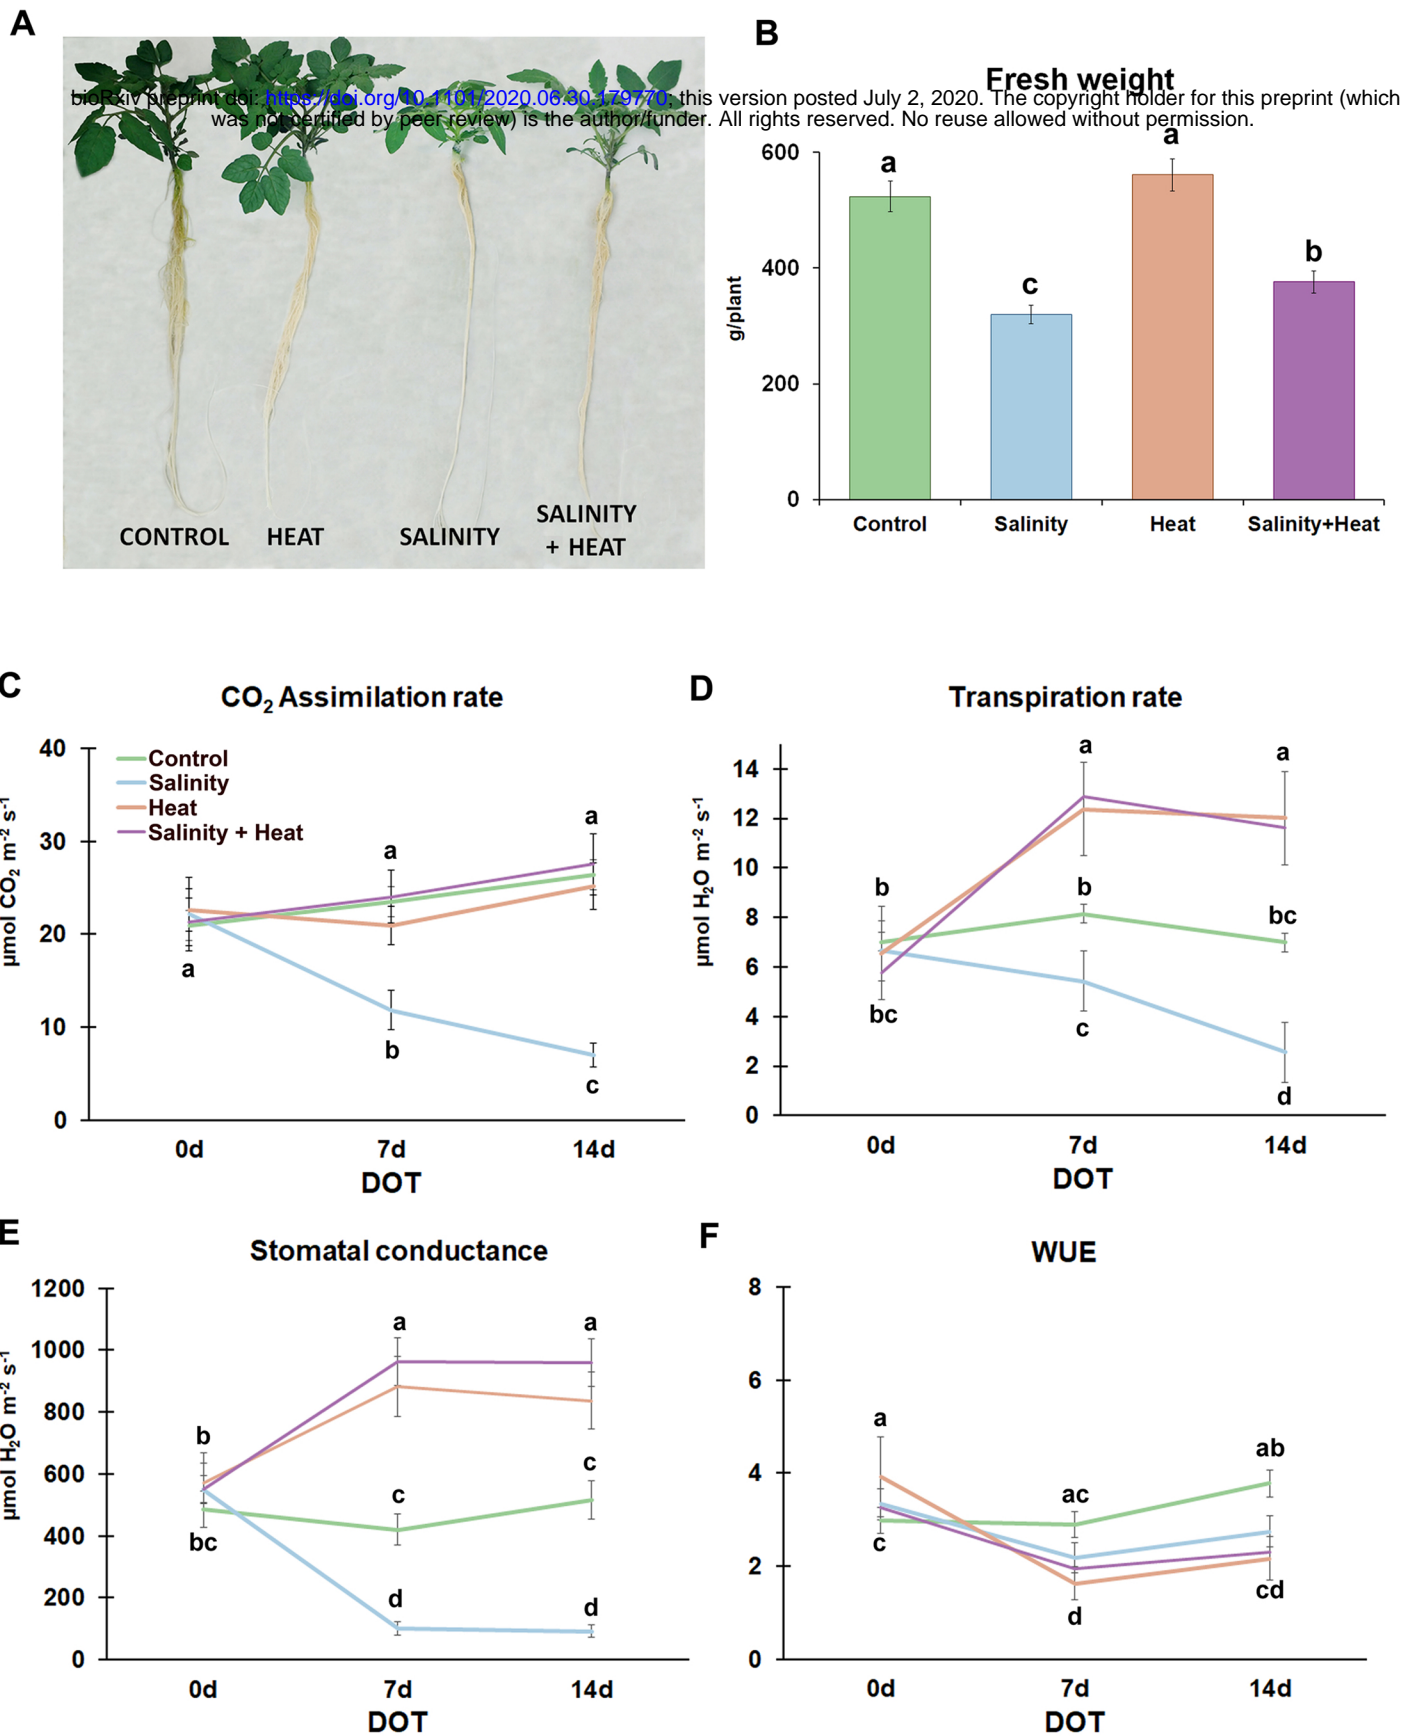

**Figure 1. (A)** Pictures of tomato plants at the end of the control or stress treatments. **(B)** Whole plant fresh weight (FW) of tomato plants grown under control, heat, salinity or the combination of salinity and heat. **(C-F)** Photosynthetic parameters measured in the third and four fully mature expanded leaves of tomato plants grown under control or stress conditions measured at the beginning (0 days), during (7 days) or at the end (14 days) of the treatments. Values represent means  $\pm$  SE ( $n = 9$ ). Bars with different letters within each panel are significantly different at  $p < 0.05$  according to Tukey's test.

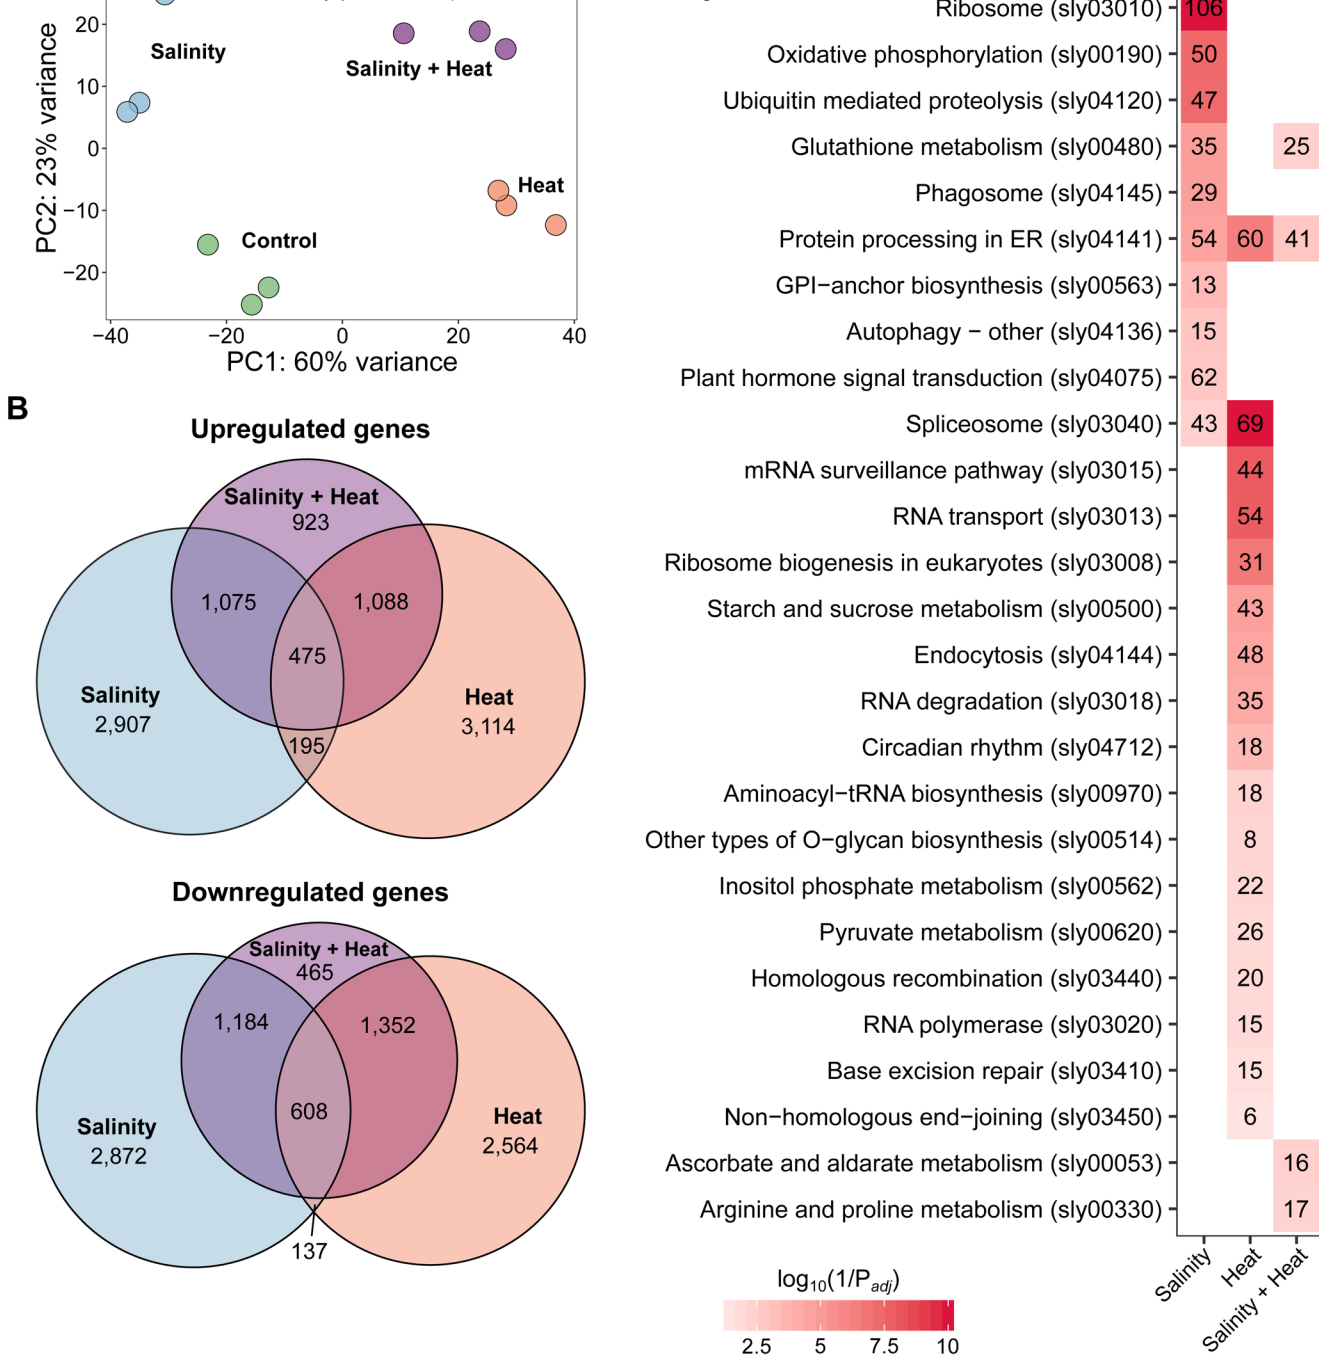

**Figure 2.** RNAseq analysis performed in tomato leaves after 14 days of growing under control or stress (salinity, heat or the combination of salinity and heat) conditions. **(A)** Principal component analysis (PCA) of the normalized reads obtained for each treatment. **(B)** Euler diagram representing up- and down-regulated genes (adjusted  $P < 0.05$ ) of tomato plants grown under control, simple (salinity or heat) or combined (salinity + heat) stress. **(C)** Pathway enrichment analysis performed within the up-regulated genes under the different stress conditions applied. More details on these analyses can be found in the Materials and Method section.

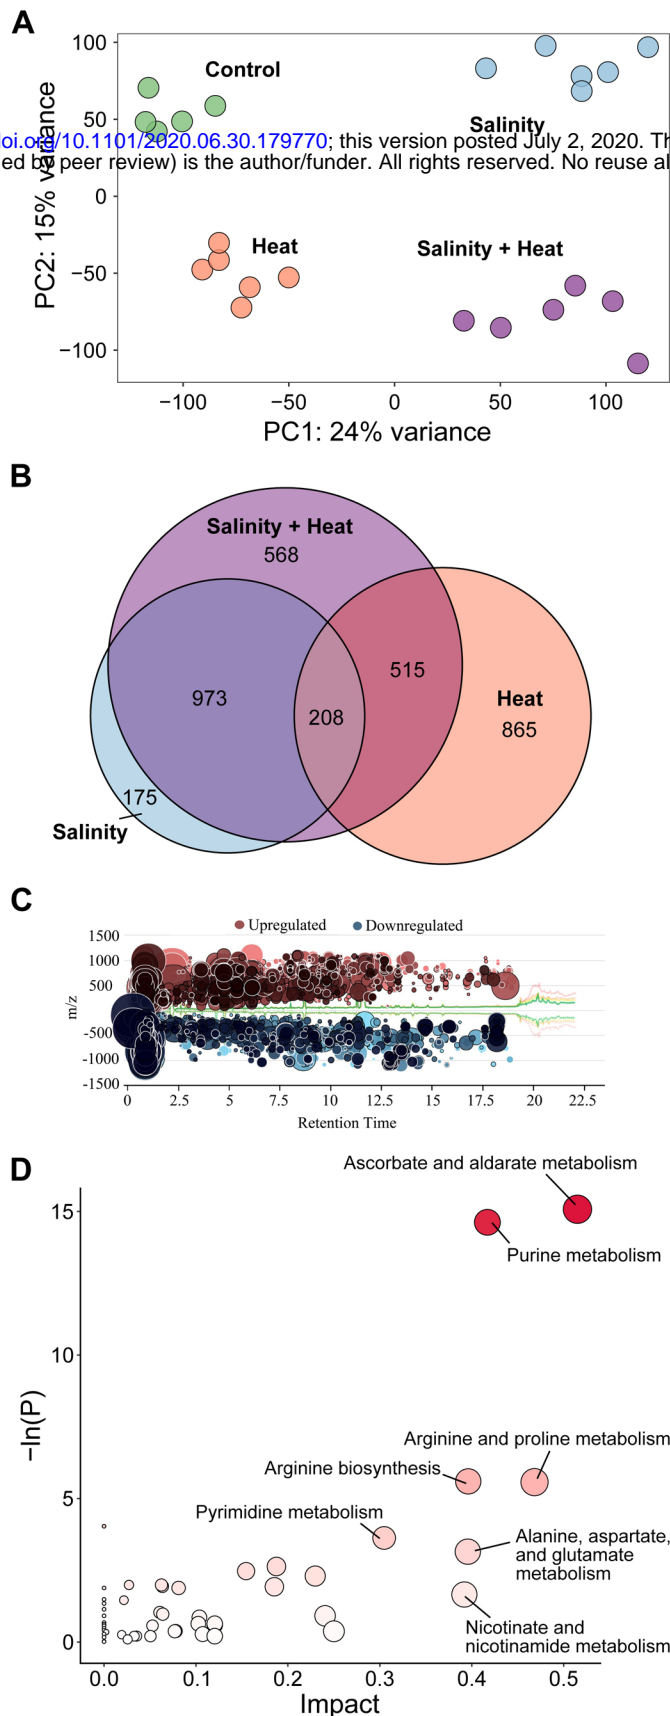

**Figure 3.** Metabolomic analysis performed in tomato leaves after 14 days of growing under control, simple (salinity or heat) or combined (salinity + heat) stress conditions. **(A)** Principal component analysis (PCA) of the normalized molecular features found under each treatment applied ( $n = 6$ ). **(B)** Euler diagram of the common and uniquely molecular features with a differential and significant accumulation in each treatment ( $P_{adj} < 0.05$ ). **(C)** Bubble diagram representing the up- and down-regulated molecular features found among the 568 molecular features uniquely and significantly changing under the combination of salinity + heat. Each bubble (i.e. molecular feature) is positioned in the chromatogram by its mass-to-charge (y-axis) and retention time (x-axis) and the size and darkness of one bubble represented the  $\log_2$  and p-value, respectively of this molecular feature. The raw data of Figure 3C can be found in the supplemental material (Supplementary Table S2 and S3). **(D)** KEGG pathway enrichment analysis performed with the significantly up-regulated molecular features identified under the combination of salinity + heat. More details on these analyses can be found in the Materials and Methods section.

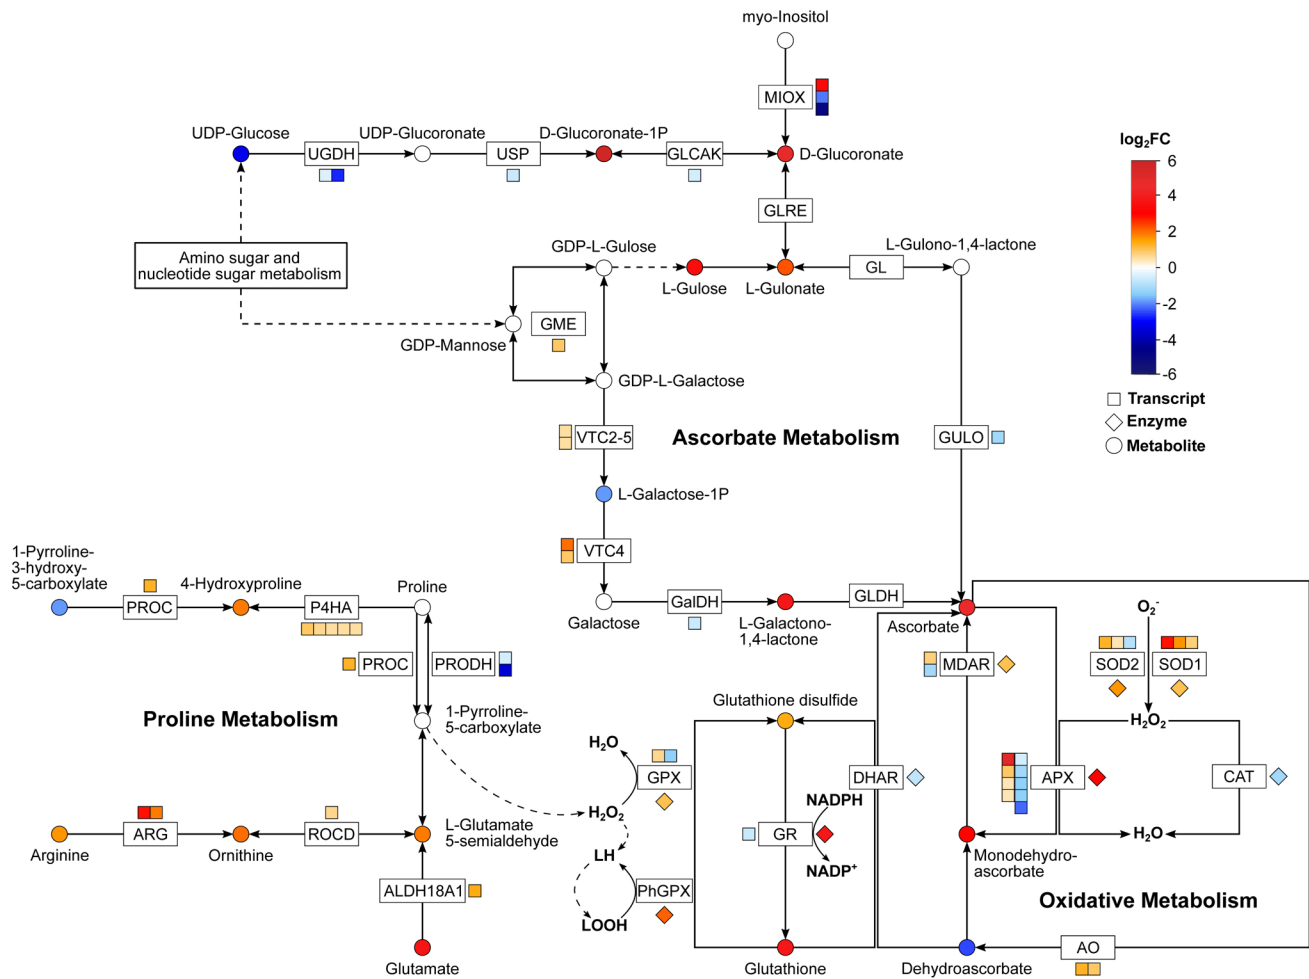

**Figure 4.** Schematic diagram of the metabolic interconnection between ascorbate, proline and oxidative metabolism in tomato plants. Log<sub>2</sub>(fold change) of the metabolite concentration (○), gene expression (□) or enzymatic activity (◇) obtained in tomato plants grown under the combination of salinity + heat after RNAseq, metabolomics or biochemical analyses were represented.

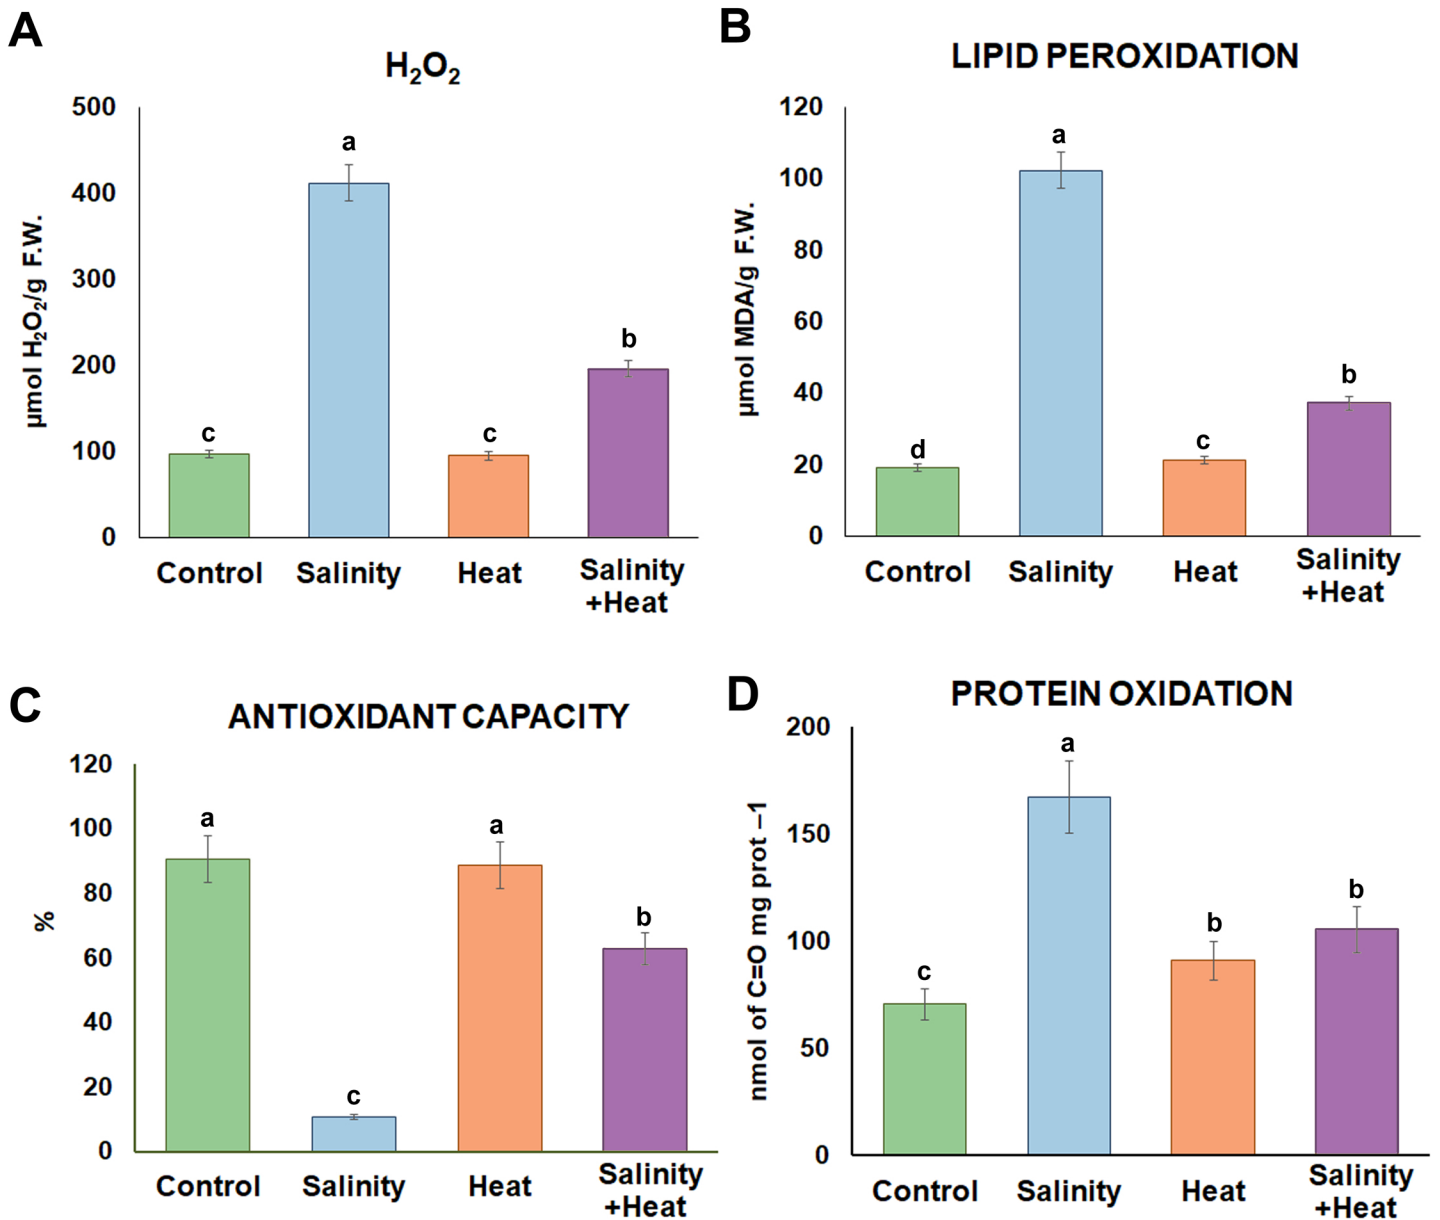

**Figure 5.** Oxidative metabolism-related markers measured in tomato leaves grown for 14 days under control, simple (salinity +heat) or combined (salinity+heat) stress. Values represent means  $\pm$  SE (n = 9). Bars with different letters within each panel are significantly different at  $p < 0.05$  according to Tukey's test.



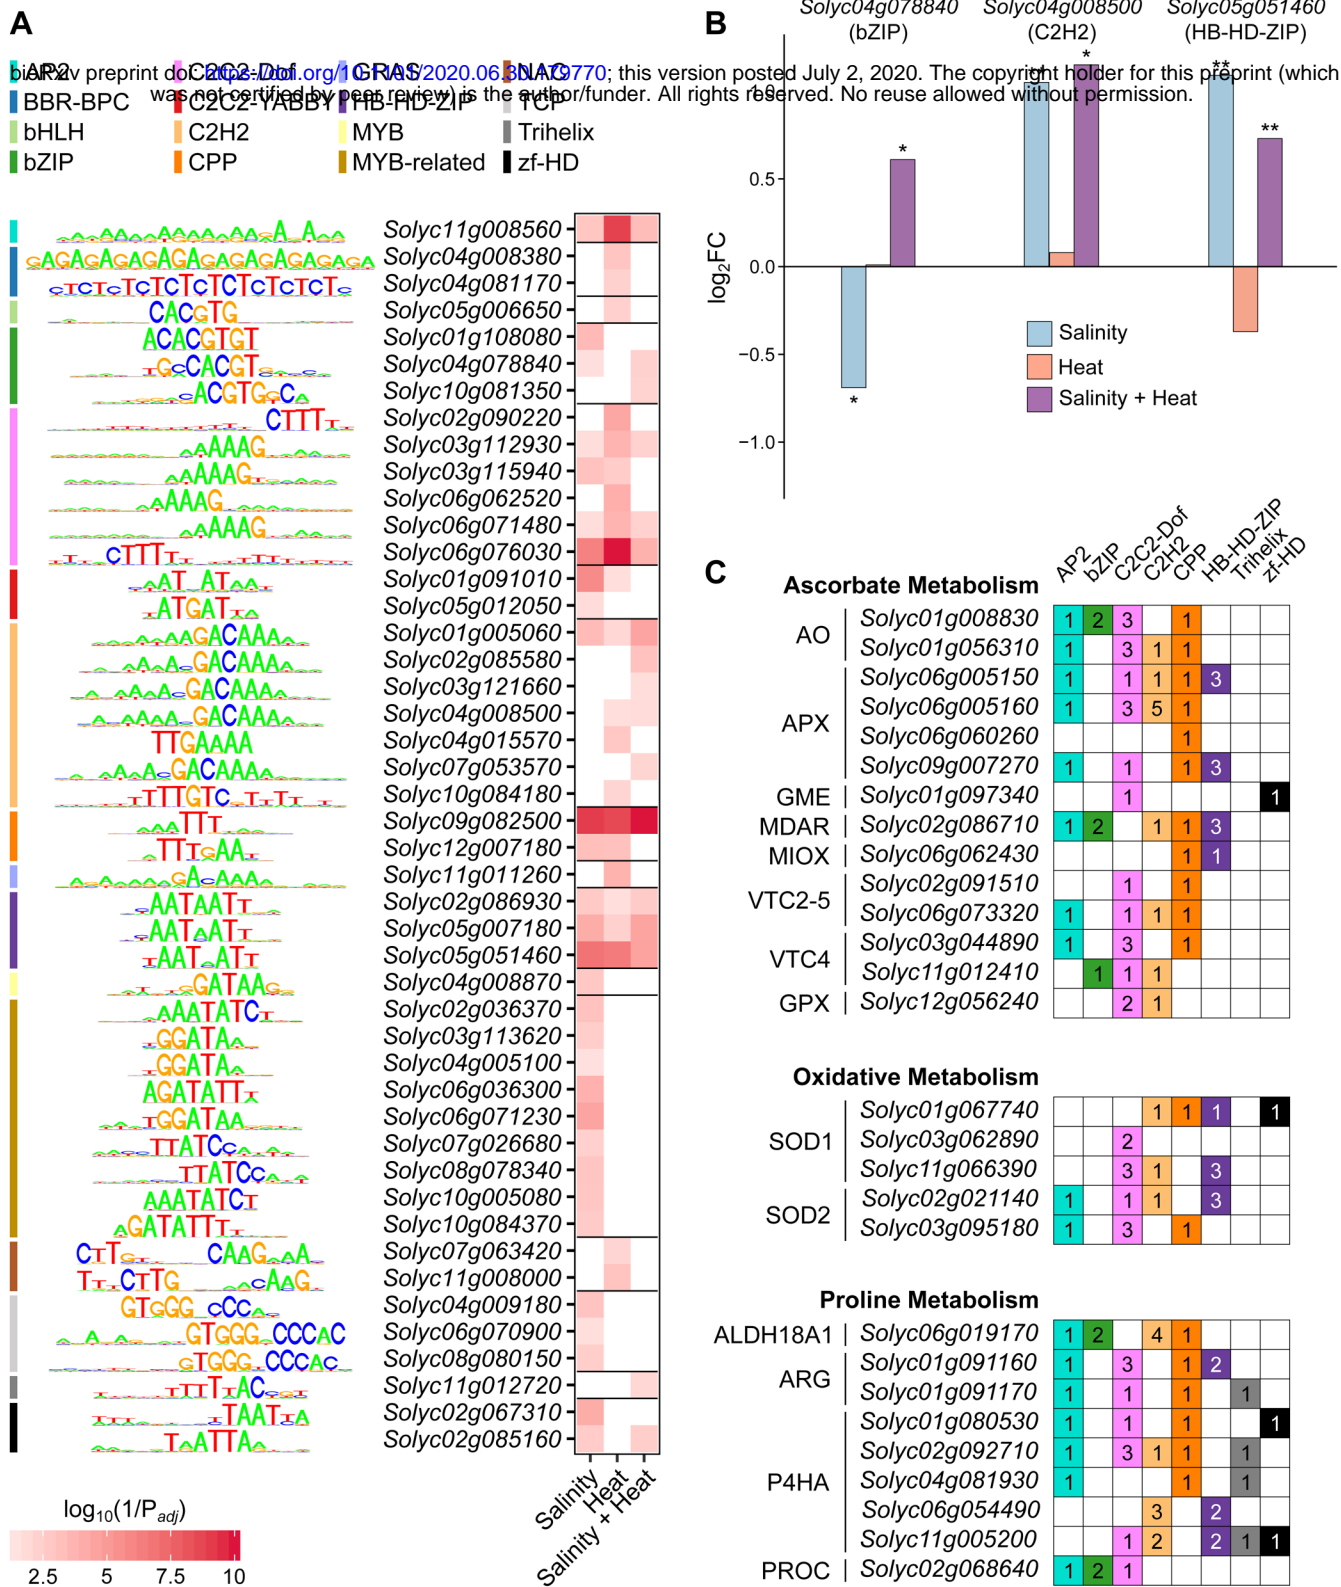

**Figure 6.** Cis-element enrichment results for up-regulated genes from each stress treatment. **(A)** Enrichment p-values for binding motifs corresponding to 46 TFs in each of the stress treatments. TFs are grouped and color coded by family, and a consensus diagram for the binding motif and gene accession is given for each. **(B)** Log<sub>2</sub>(fold change) of expression of three selected TFs in each stress treatment. **(C)** Counts of TF families overrepresented in genes up-regulated in the salinity + heat treatment from the ascorbate metabolism, oxidative metabolism, and proline metabolism families. Accessions and common abbreviations are given for each gene. Numbers in boxes refer to the count of TFs in that family with a match to that gene based on Analysis of Motif Enrichment results.
